# Supplementary material for: MCSCF response calculations of the excited states properties of the O2 molecule and a part of its spectrum
Source: Royal Society of Chemistry journal article supplement (doi:10.1039/b006712l), 2001-01-01
Supplement: tables.pdf [file tables.pdf]

MCSCF Response Calculations of the Excited States Properties of the O<sub>2</sub>  
Molecule and a Part of its Spectrum

Boris F. Minaev and Valentina A. Minaeva

*Cherkassy State University, 1800, Cherkassy, Ukraine*

*Department of Theoretical Chemistry, The Royal Institute of Technology, SE-10044, Sweden*

(January 17, 2001)

**I. ELECTRONIC SUPPLEMENTARY INFORMATION**

## TABLES

TABLE I. Magnetizability properties (isotropic magnetizability, diamagnetic and paramagnetic contributions) and molecular  $g$ -factor of the  $c^1\Sigma_u^-$  states of  $^{16}\text{O}_2$  molecule calculated by MCSCF method with the "aug-cc-pVTZ" basis sets and complete active space  $10e \times 12$  MOs (CAS-II). Components of molecular  $g$ -factor are: an isotropic  $g$ -factor, diamagnetic and electronic parts of  $g$ -factor. Nuclear part of  $g$ -factor is constant (0.5038).

| $r$ (Å) | E (a.u.)   | Magnetizabilities (a.u.) |          |          | Molecular $g$ -factor |           |            |
|---------|------------|--------------------------|----------|----------|-----------------------|-----------|------------|
|         |            | Izotrop. $\xi_i$         | Diamagn. | Paramag. | Izotrop.              | Diamagn . | Electronic |
| 1.0372  | -149.42670 | -1.814                   | -6.430   | 4.615    | -0.4041               | -0.0529   | -0.8550    |
| 1.0583  | -149.46561 | -1.908                   | -6.535   | 4.627    | -0.3703               | -0.0545   | -0.8197    |
| 1.2171  | -149.64284 | -2.470                   | -7.406   | 4.936    | -0.2013               | -0.0478   | -0.6573    |
| 1.3200  | -149.68750 | -2.544                   | -8.026   | 5.482    | -0.1619               | -0.0553   | -0.6104    |
| 1.4288  | -149.70539 | -2.449                   | -8.731   | 6.282    | -0.1474               | -0.0641   | -0.5871    |
| 1.4817  | -149.70854 | -2.387                   | -9.093   | 6.706    | -0.1426               | -0.0645   | -0.5819    |
| 1.5800  | -149.70794 | -2.162                   | -9.797   | 7.636    | -0.1435               | -0.0649   | -0.5823    |
| 1.6934  | -149.70192 | -1.662                   | -10.661  | 8.999    | -0.1603               | -0.0652   | -0.5989    |

TABLE II. Magnetizability properties (isotropic magnetizability, diamagnetic and paramagnetic contributions) and molecular  $g$ -factor of the  $b^1\Sigma_g^+$  states of  $^{16}\text{O}_2$  molecule calculated by MCSCF method with the "aug-cc-pVTZ" basis sets and complete active space  $10e \times 12$  MOs (CAS-II). Components of molecular  $g$ -factor are: an isotropic  $g$ -factor, diamagnetic and electronic parts of  $g$ -factor. Nuclear part of  $g$ -factor is constant (0.5038).

| $r$ (Å) | E (a.u.)   | Magnetizabilities (a.u.) |          |          | Molecular $g$ -factor |           |            |
|---------|------------|--------------------------|----------|----------|-----------------------|-----------|------------|
|         |            | Izotrop. $\xi_i$         | Diamagn. | Paramag. | Izotrop.              | Diamagn . | Electronic |
| 1.0583  | -149.73615 | -2.072                   | -6.478   | 4.406    | -0.3286               | -0.0538   | -0.7786    |
| 1.1000  | -149.76322 | -2.084                   | -6.695   | 4.611    | -0.3026               | -0.0567   | -0.7497    |
| 1.1880  | -149.79119 | -2.024                   | -7.186   | 5.162    | -0.2702               | -0.0568   | -0.7172    |
| 1.2408  | -149.79364 | -1.875                   | -7.496   | 5.621    | -0.2688               | -0.0618   | -0.7107    |
| 1.2700  | -149.79281 | -1.796                   | -7.674   | 5.878    | -0.2674               | -0.0625   | -0.7088    |
| 1.3700  | -149.78093 | -1.468                   | -8.309   | 6.841    | -0.2675               | -0.0639   | -0.7074    |
| 1.4817  | -149.75958 | -1.078                   | -9.068   | 7.990    | -0.2663               | -0.0648   | -0.7054    |
| 1.5875  | -149.73805 | -0.773                   | -9.835   | 9.062    | -0.2571               | -0.0652   | -0.6957    |

TABLE III. Nuclear-spin-rotation constants,  $M_O$  total in kHz (including nuclear part, diamagnetic and paramagnetic contributions) and molecular  $g$ -factor of the  $b^1\Sigma_g^+$  state of few isotope modifications of  $O_2$  molecule calculated by MCSCF method with the "aug-cc-pVDZ" basis sets and small complete active space  $10e \times 6$  MOs (2p-CAS). Large CAS-II and large basis sets are presented by <sup>a,b</sup> footnotes. Components of molecular  $g$ -factor are: an isotropic  $g$ -factor, diamagnetic and electronic parts.

| $r$ (Å)             | Isotope             | Spin-rotation constant (kHz) |         |          |          | Molecular $g$ -factor |          |            |
|---------------------|---------------------|------------------------------|---------|----------|----------|-----------------------|----------|------------|
|                     |                     | $M_{O,tot}$                  | Nuclear | Diamagn. | Paramag. | Izotrop.              | Diamagn. | Electronic |
| 1.1000              | $^{17}O$ - $^{17}O$ | 21.7551                      | -4.2852 | 1.5416   | 24.4986  | -0.2615               | -0.1 142 | -0.6366    |
| 1.1000 <sup>a</sup> | $^{16}O$ - $^{16}O$ | -                            | -       | -        | -        | -0.3026               | -0.0567  | -0.7497    |
| 1.1500              | $^{17}O$ - $^{17}O$ | 22.6607                      | -3.7502 | 1.2579   | 25.1539  | -0.2509               | -0.1 157 | -0.6246    |
| 1.2000              | $^{17}O$ - $^{17}O$ | 23.6089                      | -3.3007 | 1.0403   | 25.8693  | -0.2469               | -0.1 167 | -0.6195    |
| 1.2070              | $^{16}O$ - $^{16}O$ | -                            | -       | -        | -        | -0.2542               | -0.1203  | -0.6377    |
| 1.2270              | $^{17}O$ - $^{17}O$ | 24.1122                      | -3.0876 | 0.9443   | 26.2555  | -0.2465               | -0.1 172 | -0.6187    |
| 1.2270 <sup>b</sup> | $^{17}O$ - $^{17}O$ | 23.0055                      | -3.0876 | 1.0404   | 25.0526  | -0.2205               | - 0.1178 | -0.5921    |
| 1.2270 <sup>a</sup> | $^{17}O$ - $^{17}O$ | 23.6811                      | -3.0876 | 1.2484   | 25.5202  | -0.2221               | - 0.0622 | -0.6493    |
| 1.2408              | $^{16}O$ - $^{16}O$ | -                            | -       | -        | -        | -0.2541               | -0.1208  | -0.6371    |
| 1.2408              | $^{17}O$ - $^{17}O$ | 24.3630                      | -2.9857 | 0.9001   | 26.4486  | -0.2466               | -0.1 174 | -0.6187    |
| 1.2408 <sup>b</sup> | $^{17}O$ - $^{17}O$ | 23.1520                      | -2.9857 | 0.9983   | 25.1394  | -0.2204               | - 0.1179 | -0.5919    |
| 1.2408              | $^{18}O$ - $^{18}O$ | -                            | -       | -        | -        | -0.2400               | -0.1145  | -0.6029    |
| 1.2500              | $^{17}O$ - $^{17}O$ | 24.5262                      | -2.9202 | 0.8723   | 26.5642  | -0.2468               | -0.1 175 | -0.6187    |
| 1.3000              | $^{17}O$ - $^{17}O$ | 25.3505                      | -2.5961 | 0.7410   | 27.2056  | -0.2489               | -0. 1180 | -0.6202    |
| 1.4000              | $^{17}O$ - $^{17}O$ | 26.5489                      | -2.0786 | 0.5520   | 28.0755  | -0.2537               | -0. 1187 | -0.6244    |
| 1.4500              | $^{17}O$ - $^{17}O$ | 26.8899                      | -1.8709 | 0.4816   | 28.2792  | -0.2549               | -0. 1190 | -0.6253    |

<sup>a</sup> Large CAS-II-T (aug-cc-pVTZ-basis set). 85590 CSF's in the  $C_s$  point group.

<sup>b</sup> Large CAS-II-D (aug-cc-pVDZ-basis set). 85590 CSF's in the  $C_s$  point group.

Nuclear part of g-factor is presented by the following constants:  $^{16}\text{O}$ - $^{16}\text{O}$  (0.5038),  $^{17}\text{O}$ - $^{17}\text{O}$  (0.4894),  $^{18}\text{O}$ - $^{18}\text{O}$  (0.4774).

Nuclear  $g$ -value of the  $^{17}\text{O}$ -isotope is -0.76.

Moment of inertia at  $r_e$  distance (1.2408 Å) is 43.9697 for the  $^{16}\text{O}$ - $^{16}\text{O}$  isotope, 45.3079 for the  $^{17}\text{O}$ - $^{17}\text{O}$  isotope and 46.5621 for the  $^{18}\text{O}$ - $^{18}\text{O}$  isotope. The nuclear contribution to  $M_{17\text{O}}$  is -2.9857 kHz.

TABLE IV. Perpendicular component of the quadrupole tensor  $Q_{xx}$  ( $ea_0^2$ ), nuclear-spin-rotation constants,  $M_O$  total in kHz, for the  $^{17}\text{O}$ - $^{17}\text{O}$  isotope (including nuclear part, diamagnetic and paramagnetic contributions) and molecular  $g$ -factor of the  $a^1\Delta_g$  state calculated by MCSCF method with the "aug-cc-pVDZ" basis sets and small complete active space  $10e \times 6$  MOs (2p-CAS) at different internuclear distances  $r$  (Å). Components of molecular  $g$ -factor are: isotropic  $g$ -factor, diamagnetic and electronic parts.

| $r$ (Å)            | $Q_{xx}$ | Spin-rotation constant (kHz) |         |          |          | Molecular $g$ -factor |          |            |
|--------------------|----------|------------------------------|---------|----------|----------|-----------------------|----------|------------|
|                    |          | $M_{O,\text{tot}}$           | Nuclear | Diamagn. | Paramag. | Izotrop.              | Diamagn. | Electronic |
| 1.160              | 0.2258   | 21.4974                      | -3.6541 | 1.1905   | 23.9609  | -0.2293               | -0.1163  | -0.6023    |
| 1.216              | 0.1640   | 22.6304                      | -3.1721 | 0.9668   | 24.8356  | -0.2265               | -0.1173  | -0.5986    |
| 1.227              | 0.1524   | 22.8573                      | -3.0876 | 0.9300   | 25.0149  | -0.2266               | -0.1174  | -0.5986    |
| 1.227 <sup>a</sup> | 0.1204   | 22.1037                      | -3.0876 | 1.2205   | 23.9708  | -0.2156               | -0.0619  | -0.6431    |
| 1.270              | 0.1078   | 23.7555                      | -2.7844 | 0.8038   | 25.7361  | -0.2286               | -0.1179  | -0.6000    |
| 1.300              | 0.0803   | 24.3278                      | -2.5961 | 0.7302   | 26.1936  | -0.2306               | -0.1182  | -0.6017    |
| 1.400              | -0.0050  | 26.0256                      | -2.0786 | 0.5449   | 27.5592  | -0.2397               | -0.1189  | -0.6102    |
| 1.500              | -0.0772  | 27.0574                      | -1.6900 | 0.4180   | 28.3294  | -0.2458               | -0.1193  | -0.6159    |

<sup>a</sup> Large CAS-II-T (aug-cc-pVTZ-basis set). 85590 CSF's in the  $C_s$  point group.

Nuclear part of  $g$ -factor is 0.4894.

Nuclear  $g$ -value of the  $^{17}\text{O}$ -isotope is -0.76.

Moment of inertia at  $r_e$  distance (1.227 Å) is 44.3057 for the  $^{17}\text{O}$ - $^{17}\text{O}$  isotope. The nuclear contribution to  $M_{17\text{O}}$  is -3.0876 kHz.

TABLE V. The  $f' - X$  transition dipole moments (a.u.)<sup>1</sup> calculated by MCSCF QR method with CAS-II and the aug-cc-pVTZ basis set at different internuclear distances  $r$  (in Å) .

| $r_{OO}$ (Å)        | $D_z(f' - X_0)$ | $D_x(f' - X_1)=D_y(f' - X_1)$ | $\tau_{f'}$ , s | $\Delta E_{f'-X}$ , eV | $E_{f'}$ , hartree | $E_X$ , hartree |
|---------------------|-----------------|-------------------------------|-----------------|------------------------|--------------------|-----------------|
| 1.2478              | 0.004534        | 0.004411                      | 0.000007        | 12.85                  | -149.375405        | -149.847820     |
| 1.3229              | 0.002751        | 0.003750                      | 0.000017        | 11.56                  | -149.414568        | -149.839438     |
| 1.3970              | 0.013907        | 0.002376                      | 0.000000        | 10.47                  | -149.435686        | -149.820456     |
| 1.4817              | 0.008531        | 0.002328                      | 0.000012        | 9.62                   | -149.450079        | -149.803900     |
| 1.5081              | 0.000902        | 0.002001                      | 0.000133        | 9.27                   | -149.452524        | -149.793394     |
| 1.5611              | 0.002915        | 0.000129                      | 0.000160        | 8.76                   | -149.455247        | -149.777313     |
| 1.5875              | 0.001334        | 0.000049                      | 0.000845        | 8.54                   | -149.455723        | -149.769646     |
| 1.6011              | 0.000827        | 0.000035                      | 0.002283        | 8.44                   | -149.455780        | -149.765772     |
| 1.6011 <sup>a</sup> | 0.001890        | 0.000022                      | 0.000438        | 8.44                   | -149.465144        | -149.775174     |
| 1.6298              | 0.000892        | 0.000009                      | 0.002125        | 8.22                   | -149.455548        | -149.757692     |
| 1.6404              | 0.001603        | 0.000296                      | 0.000633        | 8.15                   | -149.455763        | -149.755165     |
| 1.8521              | 0.001238        | 0.002754                      | 0.000155        | 7.14                   | -149.445196        | -149.707597     |
| 2.0109              | 0.000000        | 0.000000                      | -               | 6.77                   | -149.435182        | -149.684153     |

<sup>1</sup> 1 a.u. =  $e \times \text{bohr}$  = 2.54 Debye

<sup>a</sup> Calculation with the aug-cc-pVQZ basis set
